# Supplementary material for: Effectiveness of Multidomain Dormitory Environment and Roommate Intervention for Improving Sleep Quality of Medical College Students: A Cluster Randomised Controlled Trial in China
Source: MDPI journal article supplement (doi:10.3390/ijerph192215337), 2022-11-20
Supplement: s1 [file s1]

## Supplementary Materials

**Table S1. Items of secondary outcome variables (except PSQI scores).**

|                                                                                                                                            |                      |                                  |                        |                  |
|--------------------------------------------------------------------------------------------------------------------------------------------|----------------------|----------------------------------|------------------------|------------------|
| 1. How do you get along with your roommates at present?                                                                                    |                      |                                  |                        |                  |
| ① Very Bad                                                                                                                                 | ② Bad                | ③ Ordinary                       | ④ Good                 | ⑤ Very Good      |
| 2. Have you considered the influence of your own behavior on your roommates when she or he was asleep in the last month?                   |                      |                                  |                        |                  |
| ① Never                                                                                                                                    | ② Occasionally       | ③ Sometimes                      | ④ Often                | ⑤ Always         |
| 3. In the last month, if your behavior had affected your roommate's sleep, after you realised or were reminded by your roommate you would: |                      |                                  |                        |                  |
| ① stop immediately                                                                                                                         | ② stop later         | ③ continue to do, but be careful | ④ ignore him (her)     |                  |
| 4. Has there been any conflict in your dormitory due to sleep problems in the last month?                                                  |                      |                                  |                        |                  |
| ① Never                                                                                                                                    | ② Occasionally       | ③ Sometimes                      | ④ Often                | ⑤ Always         |
| 5. How important do you think sleep is?                                                                                                    |                      |                                  |                        |                  |
| ① Completely unimportant                                                                                                                   | ② Not very important | ③ Moderate                       | ④ Relatively important | ⑤ Very important |

**Table S2. Items in the feedback survey for the intervention group.**

|                                                                                                     |                                |                          |                     |                                         |
|-----------------------------------------------------------------------------------------------------|--------------------------------|--------------------------|---------------------|-----------------------------------------|
| 1. After the intervention, what changes do you think in the sleeping environment of your dormitory? |                                |                          |                     |                                         |
| ① Significantly got worse                                                                           | ② A little worse               | ③ No change              | ④ Improved a little | ⑤ Significantly improved                |
| 2. After the intervention, do you feel your sleep quality has changed?                              |                                |                          |                     |                                         |
| ① Significantly got worse                                                                           | ② A little worse               | ③ No change              | ④ Improved a little | ⑤ Significantly improved                |
| 3. In general, can you accept this form of sleep intervention?                                      |                                |                          |                     |                                         |
| ① Completely unacceptable                                                                           | ② Not very acceptable          | ③ Reluctantly acceptable | ④ Acceptable        | ⑤ Very acceptable                       |
| 4. Which intervention measures do you think are the most effective? (Multiple choices are allowed)  |                                |                          |                     |                                         |
| ① Health education (oral presentation+ brochures)                                                   | ② Making dormitory sleep rules | ③ Provide earplugs       | ④ Provide eye mask  | ⑤ Other measures, please explain: _____ |

**Table S3. Results of the sensitivity analysis.**

| Sensitivity analyses                           | Outcome variables                                | Interaction term: time*group |      |         |
|------------------------------------------------|--------------------------------------------------|------------------------------|------|---------|
|                                                |                                                  | $\beta$                      | SE   | p value |
| Linear mixed-effects models with no covariates | PSQI total score                                 | -0.54                        | 0.26 | 0.041   |
|                                                | Self-rated dormitory sleep environment           | 0.11                         | 0.10 | 0.292   |
|                                                | Roommates' influence on sleep schedule           | -0.20                        | 0.11 | 0.076   |
|                                                | Dormitory environment influence on sleep quality | -0.06                        | 0.11 | 0.544   |
| Adjusting for additional covariates            | PSQI total score                                 | -0.65                        | 0.25 | 0.008   |
|                                                | Self-rated dormitory sleep environment           | 0.13                         | 0.11 | 0.228   |
|                                                | Roommates' influence on sleep schedule           | -0.21                        | 0.11 | 0.069   |
|                                                | Dormitory environment influence on sleep quality | -0.08                        | 0.11 | 0.480   |

*Note.* SE = standard error.
